# Supplementary material
Source: publisher figshare collection journal article supplement (https://frontiersin.figshare.com/ndownloader/files/30854506)
Supplement: Supplementary file [file 30854506]

**Supplementary Table 1:** Number of livestock by district and type based on 2008 Uganda Livestock Census

| Region           | District    | Cattle           | Goats            | Sheep          | Pigs             | Chicken           | Ducks          | Turkey        |
|------------------|-------------|------------------|------------------|----------------|------------------|-------------------|----------------|---------------|
| <b>Central</b>   | Kalangala   | 5,814            | 5,762            | 0              | 6,547            | 58,088            | 8,080          | 157           |
|                  | Kampala     | 31,614           | 64,072           | 8,790          | 38,306           | 1,053,031         | 28,148         | 5,675         |
|                  | Kiboga      | 365,154          | 105,250          | 26,270         | 49,595           | 428,601           | 4,582          | 883           |
|                  | Luwero      | 79,787           | 68,527           | 13,275         | 59,040           | 464,943           | 7,032          | 1,398         |
|                  | Masaka      | 224,600          | 244,706          | 28,652         | 236,148          | 1,108,363         | 58,723         | 16,223        |
|                  | Mpigi       | 216,621          | 102,828          | 23,221         | 108,082          | 600,950           | 10,456         | 1,143         |
|                  | Mubende     | 208,535          | 139,400          | 31,094         | 98,487           | 536,342           | 12,525         | 1,614         |
|                  | Mukono      | 155,820          | 206,704          | 30,808         | 181,846          | 1,551,702         | 49,517         | 5,558         |
|                  | Nakasongola | 222,185          | 87,823           | 6,839          | 35,283           | 287,834           | 6,316          | 550           |
|                  | Rakai       | 279,594          | 163,806          | 18,158         | 102,870          | 503,623           | 15,399         | 1,097         |
|                  | Ssembabule  | 177,473          | 113,204          | 14,219         | 35,399           | 194,462           | 10,011         | 2,528         |
|                  | Kayunga     | 88,814           | 82,701           | 7,707          | 38,067           | 327,603           | 14,327         | 760           |
|                  | Wakiso      | 114,769          | 132,964          | 27,542         | 199,962          | 2,783,509         | 33,350         | 4,852         |
|                  | Lyantonde   | 68,572           | 58,642           | 5,590          | 7,770            | 73,588            | 2,392          | 259           |
|                  | Mityana     | 75,767           | 51,029           | 18,000         | 80,346           | 364,398           | 8,449          | 1,786         |
|                  | Nakaseke    | 160,737          | 48,634           | 9,439          | 29,706           | 193,392           | 1,995          | 245           |
| <b>Sub Total</b> |             | <b>2,475,856</b> | <b>1,676,052</b> | <b>269,604</b> | <b>1,307,454</b> | <b>10,530,429</b> | <b>271,302</b> | <b>44,728</b> |
| <b>Eastern</b>   | Bugiri      | 118,427          | 220,778          | 14,280         | 65,453           | 943,073           | 74,332         | 6,229         |
|                  | Busia       | 26,787           | 73,565           | 2,908          | 14,203           | 391,312           | 13,041         | 3,777         |
|                  | Iganga      | 125,307          | 169,915          | 5,064          | 27,684           | 904,493           | 13,469         | 6,550         |
|                  | Jinja       | 40,247           | 71,893           | 1,691          | 26,856           | 524,159           | 10,456         | 2,463         |
|                  | Kamuli      | 211,815          | 219,194          | 6,540          | 55,239           | 724,489           | 15,538         | 2,421         |
|                  | Kapchorwa   | 95,564           | 75,073           | 9,852          | 8,070            | 285,543           | 2,898          | 427           |
|                  | Katakwi     | 136,966          | 104,932          | 25,511         | 19,381           | 286,229           | 4,902          | 3,423         |
|                  | Kumi        | 220,055          | 168,887          | 30,994         | 67,650           | 549,135           | 9,936          | 20,360        |
|                  | Mbale       | 63,826           | 96,617           | 5,108          | 23,315           | 459,868           | 13,100         | 26,162        |
|                  | Pallisa     | 136,225          | 149,003          | 20,488         | 25,302           | 440,035           | 20,748         | 27,928        |
|                  | Soroti      | 271,634          | 236,839          | 53,010         | 75,449           | 808,290           | 23,910         | 19,677        |
|                  | Tororo      | 119,587          | 154,058          | 13,086         | 45,256           | 591,552           | 24,624         | 33,535        |
|                  | Kaberamaido | 76,109           | 97,516           | 33,566         | 31,607           | 367,924           | 13,146         | 1,850         |
|                  | Mayuge      | 85,523           | 135,669          | 8,010          | 18,345           | 607,880           | 59,740         | 13,677        |
|                  | Sironko     | 92,562           | 79,141           | 9,806          | 32,733           | 391,125           | 8,496          | 19,769        |
|                  | Amuria      | 171,375          | 113,110          | 35,942         | 41,318           | 545,388           | 5,703          | 4,670         |
|                  | Budaka      | 40,231           | 51,942           | 3,987          | 5,043            | 172,627           | 6,933          | 8,940         |
|                  | Bududa      | 50,809           | 25,885           | 4,012          | 21,386           | 205,703           | 2,153          | 6,061         |
|                  | Bukedea     | 86,141           | 54,810           | 10,013         | 23,264           | 215,251           | 4,400          | 5,596         |
|                  | Bukwo       | 23,360           | 23,312           | 2,137          | 1,657            | 94,993            | 1,761          | 126           |

|                  |               |                  |                  |                  |                |                   |                |                |
|------------------|---------------|------------------|------------------|------------------|----------------|-------------------|----------------|----------------|
|                  | Butaleja      | 77,247           | 71,609           | 9,732            | 4,497          | 251,946           | 18,524         | 10,397         |
|                  | Kaliro        | 65,364           | 56,090           | 2,144            | 14,775         | 188,942           | 3,694          | 2,298          |
|                  | Manafwa       | 76,602           | 79,928           | 4,795            | 38,905         | 444,266           | 7,405          | 8,658          |
|                  | Namutumba     | 76,704           | 70,212           | 6,691            | 12,287         | 301,875           | 7,995          | 3,030          |
| <b>Sub Total</b> |               | <b>2,488,467</b> | <b>2,599,978</b> | <b>319,367</b>   | <b>699,675</b> | <b>10,696,098</b> | <b>366,904</b> | <b>238,024</b> |
| <b>Northern</b>  | Adjumani      | 131,282          | 26,030           | 26,030           | 7,449          | 391,626           | 26,267         | 971            |
|                  | Apac          | 225,088          | 279,649          | 45,967           | 28,442         | 939,652           | 34,899         | 4,043          |
|                  | Arua          | 117,157          | 273,012          | 45,922           | 22,927         | 588,824           | 21,468         | 1,402          |
|                  | Gulu          | 40,130           | 65,301           | 4,289            | 26,569         | 299,830           | 62,358         | 5,211          |
|                  | Kitgum        | 38,457           | 54,815           | 11,509           | 38,444         | 139,286           | 31,949         | 1,234          |
|                  | Kotido        | 694,247          | 535,138          | 555,688          | 1,318          | 219,598           | 12,737         | 3,863          |
|                  | Lira          | 159,533          | 161,711          | 12,749           | 28,631         | 1,116,903         | 30,927         | 4,927          |
|                  | Moroto        | 352,867          | 380,172          | 307,028          | 5,534          | 260,997           | 18,834         | 3,075          |
|                  | Moyo          | 103,873          | 190,341          | 37,742           | 9,034          | 373,086           | 15,808         | 776            |
|                  | Nebbi         | 101,952          | 302,576          | 46,084           | 19,895         | 583,704           | 34,727         | 1,304          |
|                  | Nakapiripirit | 674,746          | 547,365          | 389,676          | 322            | 314,308           | 15,653         | 1,095          |
|                  | Pader         | 57,087           | 57,807           | 6,298            | 39,430         | 150,317           | 43,197         | 1,144          |
|                  | Yumbe         | 223,649          | 409,793          | 151,356          | 17,511         | 709,483           | 10,888         | 1,097          |
|                  | Abim          | 13,635           | 37,229           | 8,381            | 17,354         | 61,330            | 3,373          | 2,213          |
|                  | Amolatar      | 81,269           | 70,318           | 34,293           | 11,503         | 265,076           | 15,780         | 1,189          |
|                  | Amuru         | 33,063           | 67,092           | 9,773            | 19,180         | 142,121           | 44,754         | 2,558          |
|                  | Dokolo        | 58,902           | 71,815           | 16,361           | 13,602         | 291,027           | 14,777         | 623            |
|                  | Kaabong       | 518,465          | 525,389          | 424,729          | 33,829         | 506,585           | 16,849         | 1,551          |
|                  | Koboko        | 54,204           | 101,602          | 33,250           | 272            | 209,513           | 9,742          | 648            |
|                  | Nyadri        | 123,640          | 286,929          | 67,543           | 29,222         | 793,213           | 32,534         | 2,137          |
|                  | Oyam          | 118,603          | 172,052          | 19,347           | 28,350         | 650,758           | 21,918         | 2,606          |
| <b>Sub Total</b> |               | <b>3,921,849</b> | <b>4,616,136</b> | <b>2,254,015</b> | <b>398,818</b> | <b>9,007,237</b>  | <b>519,439</b> | <b>43,667</b>  |
| <b>Western</b>   | Bundibugyo    | 163,913          | 131,765          | 14,824           | 14,692         | 312,931           | 27,645         | 519            |
|                  | Bushenyi      | 207,184          | 376,561          | 79,757           | 57,467         | 364,568           | 19,971         | 2,343          |
|                  | Hoima         | 109,998          | 187,128          | <b>25,593</b>    | 104,669        | 942,843           | 26,898         | 2,677          |
|                  | Kabale        | 98,552           | 201,597          | 83,060           | 22,255         | 218,800           | 5,726          | 865            |
|                  | Kabarole      | 67,115           | 155,264          | 13,510           | 40,781         | 352,530           | 8,990          | 1,742          |
|                  | Kasese        | 97,243           | 227,518          | 24,890           | 85,812         | 752,800           | 45,036         | 4,694          |
|                  | Kibaale       | 174,926          | 199,572          | 24,329           | 153,512        | 879,032           | 34,194         | 2,140          |
|                  | Kisoro        | 28,083           | 96,815           | 39,554           | 10,171         | 111,347           | 1,481          | 128            |
|                  | Masindi       | 213,402          | 233,423          | 24,943           | 87,616         | 1,007,182         | 39,362         | 1,843          |
|                  | Mbarara       | 149,992          | 176,464          | 22,588           | 12,243         | 239,470           | 5,966          | 711            |
|                  | Ntungamo      | 229,004          | 273,284          | 41,556           | 8,899          | 184,760           | 8,814          | 457            |
|                  | Rukungiri     | 60,061           | 134,757          | 19,262           | 25,176         | 138,100           | 5,858          | 515            |
|                  | Kamwenge      | 120,906          | 154,422          | 26,239           | 34,280         | 339,191           | 11,237         | 363            |

|                      |          |                   |                   |                  |                  |                   |                  |                |
|----------------------|----------|-------------------|-------------------|------------------|------------------|-------------------|------------------|----------------|
|                      | Kanungu  | 31,120            | 105,498           | 12,849           | 22,900           | 196,564           | 8,701            | 427            |
|                      | Kyenjojo | 184,537           | 254,966           | 38,235           | 73,345           | 579,743           | 6,712            | 598            |
|                      | Buliisa  | 34,801            | 43,326            | 3,884            | 849              | 99,932            | 18,542           | 115            |
|                      | Ibanda   | 55,126            | 89,704            | 13,997           | 12,164           | 144,301           | 6,851            | 153            |
|                      | Isingiro | 180,345           | 221,491           | 30,298           | 7,552            | 203,564           | 13,905           | 1,370          |
|                      | Kiruhura | 342,315           | 188,686           | 28,017           | 3,967            | 142,459           | 4,719            | 235            |
| <b>Sub<br/>Total</b> |          | <b>2,548,623</b>  | <b>3,452,241</b>  | <b>567,385</b>   | <b>778,350</b>   | <b>7,210,117</b>  | <b>300,608</b>   | <b>21,895</b>  |
| <b>Uganda</b>        |          | <b>11,434,795</b> | <b>12,344,407</b> | <b>3,410,371</b> | <b>3,184,297</b> | <b>37,443,881</b> | <b>1,458,253</b> | <b>348,314</b> |

Source: Ministry of Agriculture, Animal Industry and Fisheries (MAAIF), and Uganda Bureau of Statistics (14).

**Supplementary Table 2:** Category of respondents and estimated number of respondents targeted per district before study implementation.

|                          | Central |        |        |          | Southwest |            | <b>Total</b> |
|--------------------------|---------|--------|--------|----------|-----------|------------|--------------|
|                          | Kampala | Wakiso | Mukono | Nakaseke | Mbarara   | Ssembabule |              |
| Laboratory technicians   | 5       | 2      | 1      | 1        | 2         | 1          | 12           |
| Veterinary practitioners | 4       | 4      | 4      | 4        | 4         | 4          | 24           |
| Animal production        | 2       | 2      | 2      | 2        | 2         | 2          | 12           |
| AHO                      | 2       | 2      | 2      | 2        | 2         | 2          | 12           |
| Commercial Cattle        | 0       | 2      | 4      | 8        | 10        | 8          | 32           |
| Commercial Pig           | 2       | 10     | 10     | 0        | 2         | 2          | 26           |
| Commercial poultry       | 4       | 10     | 10     | 2        | 4         | 0          | 30           |
| Key informants           | 7       | 1      | 1      | 1        | 1         | 1          | 12           |
| <b>Total</b>             | 26      | 33     | 34     | 20       | 27        | 20         | <b>160</b>   |

*AHO=Animal Husbandry Officer*

**Supplementary Table 3:** Demographic characteristics and perceptions of laboratory technologists/technicians on veterinary diagnostic services.

| Question                                                                                  | Variable                                                  | Frequency | Percentage |
|-------------------------------------------------------------------------------------------|-----------------------------------------------------------|-----------|------------|
| Laboratory description (n=16)                                                             | Academic (research/teaching) laboratory                   | 7         | 44         |
|                                                                                           | Government                                                | 6         | 38         |
|                                                                                           | Private laboratory                                        | 1         | 6          |
|                                                                                           | Public/non-government                                     | 2         | 12         |
| Years worked in laboratory (n=16)                                                         | 0-5 years                                                 | 6         | 38         |
|                                                                                           | 6-10 years                                                | 5         | 31         |
|                                                                                           | 11-20 years                                               | 2         | 12         |
|                                                                                           | Over 20 years                                             | 3         | 19         |
| Clinicians appreciate laboratory Diagnosis (n=14)                                         | I'm not sure                                              | 1         | 7          |
|                                                                                           | Yes                                                       | 13        | 93         |
|                                                                                           | No                                                        | 0         | 0          |
| Farmers appreciate laboratory Diagnosis (n=14)                                            | I'm not sure                                              | 2         | 14         |
|                                                                                           | Yes                                                       | 12        | 86         |
|                                                                                           | No                                                        | 0         | 0          |
| Farmers willingness to pay for diagnostic services (n=14)                                 | I'm not sure                                              | 2         | 14         |
|                                                                                           | No                                                        | 1         | 7          |
|                                                                                           | Yes                                                       | 11        | 79         |
| Can Veterinary diagnostic laboratories run profitably (n=14)                              | I'm not sure                                              | 2         | 14         |
|                                                                                           | No                                                        | 1         | 7          |
|                                                                                           | Yes                                                       | 11        | 79         |
| Have you ever conducted customers surveys to understand diagnostic need of clients (n=14) | I'm not sure                                              | 1         | 7          |
|                                                                                           | Do not conduct marketing survey                           | 7         | 50         |
|                                                                                           | Conduct marketing survey                                  | 6         | 43         |
| Attended continued professional training in the last 2 years (n=14)                       | No                                                        | 4         | 29         |
|                                                                                           | Yes                                                       | 10        | 71         |
| If no, reasons for non-attendance of professional training (n=4)                          | Training not available                                    | 3         | 75         |
|                                                                                           | Organisational problems - both local government and MAAIF | 1         | 25         |
|                                                                                           |                                                           |           |            |

**Supplementary Table 4:** Demographic characteristics and perceptions of animal health workers on veterinary diagnostic services.

| <b>Question</b>                                         | <b>Variables</b>                                           | <b>Frequency</b> | <b>Percentage</b> |
|---------------------------------------------------------|------------------------------------------------------------|------------------|-------------------|
| <b>Employment sector (n=57)</b>                         | Academic (research/teaching) lab                           | 3                | 5                 |
|                                                         | Government employee                                        | 39               | 68                |
|                                                         | Non-governmental organisation employee                     | 5                | 9                 |
|                                                         | Private practice                                           |                  |                   |
| <b>Years of work practice experience (n=57)</b>         | 0-5 years                                                  | 15               | 26                |
|                                                         | 11-20 years                                                | 21               | 37                |
|                                                         | 6-10 years                                                 | 15               | 26                |
|                                                         | Over 20 years                                              | 6                | 6                 |
|                                                         | Prefer not to say                                          | 0                | 0                 |
| <b>Type of current practice (n=57)</b>                  | Exotic practice (rabbits, parrots, tortoise, snakes etc.)  | 1                | 2                 |
|                                                         | Mixed practice (two or more of the practices listed above) | 18               | 32                |
|                                                         | Poultry practice (chickens, turkey etc.)                   | 7                | 12                |
|                                                         | Ruminants (cattle, sheep, goats etc.)                      | 27               | 47                |
|                                                         | Small animal practice (dogs, cats)                         | 1                | 2                 |
|                                                         | Others                                                     | 3                | 5                 |
| <b>Frequency of sample submission (n=57)</b>            | 1-2 times in six months                                    | 15               | 26                |
|                                                         | 1-3 times per month                                        | 6                | 11                |
|                                                         | 3-6 times in six months                                    | 16               | 28                |
|                                                         | Over 3 times a month                                       | 12               | 21                |
|                                                         | Never                                                      | 8                | 14                |
|                                                         | Don't know                                                 | 0                | 0                 |
| <b>Animal species from which samples were submitted</b> | Cattle                                                     | 42               | 74                |
|                                                         | Chickens                                                   | 17               | 30                |
|                                                         | Goats                                                      | 23               | 40                |
|                                                         | Pigs                                                       | 9                | 16                |
|                                                         | Sheep                                                      | 3                | 5                 |
|                                                         | Horse, Donkeys, Mules                                      | 0                | 0                 |
|                                                         | Ducks or geese                                             | 1                | 1                 |
|                                                         | Turkeys                                                    | 1                | 1                 |
|                                                         | Others                                                     | 1                | 1                 |

**Supplementary Table 5:** Demographic characteristics and perceptions of farmers on veterinary diagnostic services.

| <b>Question</b>                                                         | <b>Variable</b>           | <b>Frequency</b> | <b>Percentage</b> |
|-------------------------------------------------------------------------|---------------------------|------------------|-------------------|
| <b>Livestock production sector in which farmers are involved (n=86)</b> | Cattle farming            | 29               | 34                |
|                                                                         | Pig farming               | 24               | 28                |
|                                                                         | Poultry farming           | 32               | 37                |
|                                                                         | Others                    | 1                | 1                 |
| <b>Type of animal species kept at present</b>                           | Cattle                    | 45               | 52                |
|                                                                         | Chickens                  | 45               | 52                |
|                                                                         | Goats                     | 35               | 41                |
|                                                                         | Pigs                      | 34               | 40                |
|                                                                         | Sheep                     | 7                | 8                 |
|                                                                         | Horses, donkeys, or mules | 1                | 1                 |
|                                                                         | Ducks or geese            | 1                | 1                 |
|                                                                         | Turkeys                   | 2                | 2                 |
|                                                                         | Fish/ aquaculture         | 0                | 0                 |
|                                                                         | Others                    | 0                | 0                 |
| <b>Number of years of experience in farming (n=86)</b>                  | 0-5 years                 | 21               | 24                |
|                                                                         | 6 - 10 years              | 25               | 29                |
|                                                                         | 11- 20 years              | 15               | 17                |
|                                                                         | Over 20 years             | 24               | 28                |
|                                                                         | Prefer not to say         | 1                | 1                 |
| <b>Frequency of sample submission in the last 6 months (n=86)</b>       | 1-2 times in six months   | 18               | 21                |
|                                                                         | 1-3 times per month       | 0                | 0                 |
|                                                                         | 3-6 times in six months   | 12               | 14                |
|                                                                         | Over 3 times a month      | 0                | 0                 |
|                                                                         | Never                     | 53               | 62                |
|                                                                         | Don't know                | 3                | 3                 |
|                                                                         | Others                    | 0                | 0                 |
| <b>Animal species whose sample were submitted mostly</b>                | Cattle                    | 20               | 23                |
|                                                                         | Chickens                  | 11               | 13                |
|                                                                         | Goats                     | 8                | 9                 |
|                                                                         | Pigs                      | 3                | 3                 |
|                                                                         | Sheep                     | 1                | 1                 |
|                                                                         | Horses, Donkeys, Mules    | 0                | 0                 |
|                                                                         | Ducks or geese            | 0                | 0                 |
|                                                                         | Turkeys                   | 0                | 0                 |
|                                                                         | Others                    | 0                | 0                 |

**Supplementary Table 6:** Reported trainings attended by laboratory technologists/technicians (n = 10).

| <b>Training list</b>                                                                   |
|----------------------------------------------------------------------------------------|
| Administration and management                                                          |
| Audit management                                                                       |
| Basic laboratory techniques                                                            |
| Bio-risk management                                                                    |
| Biosafety and biosecurity principles.                                                  |
| Biosafety and Biosecurity training in basic microbiology techniques held at COVAB 2020 |
| Equipment maintenance and calibration                                                  |
| Infectious disease diagnostics in disease surveillance                                 |
| Laboratory management                                                                  |
| Orientation training at NADDEC                                                         |
| Post-mortem of chicken by ZOETIS                                                       |
| Quality assurance                                                                      |
| Rabies diagnostics (FAT; ELISA testing and rabies viral neutralisation test)           |
| Research                                                                               |
| Zoonotic diseases - samples handling to prevent animal to human disease transmission   |



**Supplementary Table 7:** The list of instruments/equipment most often used in the laboratories. The data shows instruments and proportion of laboratory technicians (n = 16) who mentioned each type of instrument/equipment.

| Instrument                 | Frequency of reporting (n=16) | Percentage |
|----------------------------|-------------------------------|------------|
| Microscope                 | 12                            | 75         |
| Fridge/Freezer             | 8                             | 50         |
| Pipettes                   | 7                             | 44         |
| Incubator                  | 7                             | 44         |
| Centrifuge                 | 7                             | 44         |
| Autoclave                  | 5                             | 31         |
| Biosafety cabinet          | 4                             | 25         |
| Weighing Balance           | 4                             | 25         |
| Computer                   | 3                             | 19         |
| PH meter                   | 3                             | 19         |
| Steamers/water bath        | 3                             | 19         |
| Bunsen burner              | 2                             | 13         |
| Differential tally counter | 2                             | 13         |
| ELISA Reader               | 2                             | 13         |
| Glass slides               | 2                             | 13         |
| Hot air Oven               | 2                             | 13         |
| Microtome                  | 2                             | 13         |
| PCR Machine                | 2                             | 13         |
| Water distiller            | 2                             | 13         |
| Automatic Shaker           | 1                             | 6          |
| Auto-tissue processors     | 1                             | 6          |
| Cooler box                 | 1                             | 6          |
| Digital pregnancy scanner  | 1                             | 6          |
| Embedding assemblies       | 1                             | 6          |
| Gas cylinder.              | 1                             | 6          |
| Gel documentation machines | 1                             | 6          |
| Haematocrit centrifuge     | 1                             | 6          |
| HB meter                   | 1                             | 6          |
| Heat block                 | 1                             | 6          |
| Histokinette               | 1                             | 6          |
| Hood                       | 1                             | 6          |
| HPLC                       | 1                             | 6          |
| Ice maker                  | 1                             | 6          |
| Lyophiliser                | 1                             | 6          |
| McMaster slide             | 1                             | 6          |
| Microwave                  | 1                             | 6          |
| Pipette tips               | 1                             | 6          |
| Plate Washer machine       | 1                             | 6          |
| PM kit                     | 1                             | 6          |

| <b>Instrument</b>          | <b>Frequency of reporting (n=16)</b> | <b>Percentage</b> |
|----------------------------|--------------------------------------|-------------------|
| Refractometer              | 1                                    | 6                 |
| Sahli apparatus            | 1                                    | 6                 |
| Spreaders/inoculating loop | 1                                    | 6                 |
| Staining rack              | 1                                    | 6                 |
| Tiles                      | 1                                    | 6                 |
| Water purifiers            | 1                                    | 6                 |

**Supplementary Table 8:** Factors that influence the decision of farmers (n = 86) and animal health workers (n= 57) to submit samples to the laboratory.

| Very important factors                                                                                     | All     | Farmers | AHW*    |
|------------------------------------------------------------------------------------------------------------|---------|---------|---------|
|                                                                                                            | n (%)   | n (%)   | n (%)   |
| Confidentiality of laboratory reports                                                                      | 5 (3)   | 2 (2)   | 3 (5)   |
| Reception area (someone present and space to sit)                                                          | 6 (4)   | 4 (5)   | 2 (4)   |
| Willingness to pay for laboratory tests and value for money                                                | 21 (15) | 13 (15) | 8 (14)  |
| Availability of sample collection, preservation and transportation materials                               | 25 (17) | 14 (16) | 11 (19) |
| Accreditation (National or international) of laboratory                                                    | 26 (18) | 13 (15) | 13 (23) |
| Confidence in test result                                                                                  | 26 (18) | 12 (14) | 14 (25) |
| Organization and cleanliness of laboratory and building                                                    | 27 (19) | 12 (14) | 15 (25) |
| Guiding and communication between staff and clients on samples submitted                                   | 35 (24) | 20 (23) | 15 (26) |
| Quality of laboratory report (completeness, comprehension etc) and clear explanation of test results       | 40 (28) | 18 (21) | 22 (39) |
| Prescription of intervention by clinician attached to the laboratory or referral to a veterinary clinician | 51 (36) | 39 (45) | 12(21)  |
| Range of diagnostic tests available to clients                                                             | 55 (38) | 26 (30) | 29 (51) |
| Turn-around time for tests done and results given                                                          | 66 (46) | 46 (53) | 20 (35) |
| Professionalism, respect and appreciation of laboratory staff towards clients                              | 67 (47) | 39 (45) | 28 (49) |
| Affordability of services                                                                                  | 68 (48) | 50 (58) | 18 (32) |
| Location and accessibility (proximity of laboratory to my farm/ home)                                      | 91 (64) | 63 (73) | 28 (49) |
| Availability of laboratory staff during working hours and beyond                                           | 95 (66) | 52 (60) | 43 (75) |

\*AHW = Animal Health Worker

**Supplementary Table 9:** Key aspects that require improvement in order to attract more clients and improve client satisfaction with veterinary diagnostic services, as reported by laboratory personnel (n = 14).

| Themes of suggested solutions to challenges affecting veterinary laboratories         | Frequency<br>(n=14) | Percentage |
|---------------------------------------------------------------------------------------|---------------------|------------|
| Sensitization of farmers to use of laboratory service                                 | 6                   | 43         |
| Improve quality of service including quality result report and professionalism        | 7                   | 50         |
| Increase access to laboratory including open hours and transport availability         | 6                   | 43         |
| Provision of lab equipment, test kits and supplies                                    | 5                   | 36         |
| Training of the lab personnel, vet and field extension personnel on sample collection | 4                   | 29         |
| Improve turnaround time for reporting of test results                                 | 4                   | 29         |
| Need for accreditation of the veterinary labs                                         | 3                   | 21         |
| Improvement of lab customer service and marketing                                     | 3                   | 21         |
| Availability of technical laboratory staff                                            | 3                   | 21         |
| Increase range of services provided                                                   | 2                   | 14         |
| <b>Others</b>                                                                         |                     |            |
| Subsidize costs/charges to make the service affordable                                | 1                   | 7          |
| Power backup/standby generator to help in offering uninterrupted diagnostic services. | 1                   | 7          |
| Lab management/administration                                                         | 1                   | 7          |
| Referral system of samples                                                            | 1                   | 7          |
| Need for labs to specialize (eliminate service duplication)                           | 1                   | 7          |
| Improve biosafety (waste disposal procedures)                                         | 1                   | 7          |
| Improve lab information collection systems                                            | 1                   | 7          |

**Supplementary Table 10:** Satisfaction of farmers (n = 86), animal health workers (n = 57) and all combined (n = 143) with the laboratory facilities (location, organisation, cleanliness, and laboratory reception area).

| Rate                               | Location |         |         | Organisation |         |         | Cleanliness |         |         | Reception area |         |         |
|------------------------------------|----------|---------|---------|--------------|---------|---------|-------------|---------|---------|----------------|---------|---------|
|                                    | All      | Farmers | AHW     | All          | Farmers | AHW     | All         | Farmers | AHW     | All            | Farmers | AHW     |
|                                    | n (%)    | n (%)   | n (%)   | n (%)        | n (%)   | n (%)   | n (%)       | n (%)   | n (%)   | n (%)          | n (%)   | n (%)   |
| I'm not sure                       | 27 (19)  | 25(30)  | 2 (4)   | 29 (21)      | 27 (32) | 2(4)    | 33 (24)     | 30 (36) | 3 (5)   | 31 (23)        | 29 (35) | 2 (4)   |
| Neither satisfied nor dissatisfied | 23 (16)  | 20 (24) | 3 (5)   | 25 (18)      | 23 (27) | 2 (4)   | 25 (18)     | 22 (27) | 3 (5)   | 29 (21)        | 24 (29) | 5 (9)   |
| Slightly dissatisfied              | 4 (3)    | 3 (4)   | 1 (2)   | 6 (4)        | 1 (1)   | 5 (9)   | 0           | 0       | 0       | 1 (1)          | 0       | 1 (2)   |
| Very dissatisfied                  | 3 (2)    | 1 (1)   | 2 (4)   | 2 (1)        | 1 (1)   | 1 (2)   | 2 (1)       | 0       | 2 (4)   | 2 (1)          | 0       | 2 (4)   |
| Slightly satisfied                 | 40 (28)  | 9 (11)  | 31 (54) | 31 (22)      | 8 (10)  | 23 (41) | 30 (22)     | 10 (12) | 20(36)  | 34 (25)        | 13 (16) | 21 (39) |
| Very satisfied                     | 44 (31)  | 26 (31) | 18 (32) | 47 (34)      | 24 (29) | 23 (41) | 49 (35)     | 21 (25) | 28 (50) | 40 (29)        | 17 (20) | 23 (43) |

**Supplementary Table 11:** Satisfaction of farmers (n = 86) and animal health professionals (n = 57) with the laboratory staff (staff availability, staff appearance, staff demeanour, staff appreciation to clients, and sample submission and processing turnaround time).

| Rate                               | Availability |         | Appearance |         | Demeanour |         | Appreciation of Clients |         | Turn-around time |         |
|------------------------------------|--------------|---------|------------|---------|-----------|---------|-------------------------|---------|------------------|---------|
|                                    | Farmers      | AHW     | Farmers    | AHW     | Farmers   | AHW     | Farmers                 | AHW     | Farmers          | AHW     |
|                                    | n (%)        | n (%)   | n (%)      | n (%)   | n (%)     | n (%)   | n (%)                   | n (%)   | n (%)            | n (%)   |
| I'm not sure                       | 27 (31)      | 2 (4)   | 27 (32)    | 2 (4)   | 27 (32)   | 2 (4)   | 27 (32)                 | 2 (4)   | 24 (29)          | 2 (4)   |
| Neither satisfied nor dissatisfied | 23 (27)      | 3 (5)   | 23 (27)    | 2 (4)   | 22 (26)   | 4 (7)   | 23 (27)                 | 3 (5)   | 22 (26)          | 6 (11)  |
| Slightly dissatisfied              |              | 1 (2)   |            | 1 (2)   | 1 (1)     | 2 (4)   | 1 (1)                   | 2 (4)   | 2 (2)            | 3 (5)   |
| Very dissatisfied                  |              | 2 (4)   |            | 2 (4)   | 1 (1)     | 1 (2)   | 1 (1)                   | 1 (2)   | 1 (1)            | 1 (2)   |
| Slightly satisfied                 | 8 (9)        | 26 (46) | 7 (8)      | 22 (39) | 5 (6)     | 16 (28) | 6 (7)                   | 19 (33) | 11 (13)          | 19 (33) |
| Very satisfied                     | 28 (33)      | 23 (40) | 28 (33)    | 28 (49) | 29 (34)   | 32 (56) | 27 (32)                 | 30 (53) | 24 (29)          | 26 (46) |

**Supplementary Table 12:** Satisfaction of farmers (n = 86) and animal health workers (n = 57) with the laboratory services (diagnostic tests performed, affordability of laboratory tests, turnaround time for results delivery, confidence in test results, laboratory report quality, report confidentiality and value for money).

|                                    | Diagnostic tests performed |         | Affordability of lab Tests |         | Turnaround time |         | Confidence in test results |         | Lab report quality |         | Report confidentiality |         | Value for money |         |
|------------------------------------|----------------------------|---------|----------------------------|---------|-----------------|---------|----------------------------|---------|--------------------|---------|------------------------|---------|-----------------|---------|
|                                    | Farmers                    | AHW     | Farmers                    | AHW     | Farmers         | AHW     | Farmers                    | AHW     | Farmers            | AHW     | Farmers                | AHW     | Farmers         | AHW     |
|                                    | n (%)                      | n (%)   | n (%)                      | n (%)   | n (%)           | n (%)   | n (%)                      | n (%)   | n (%)              | n (%)   | n (%)                  | n (%)   | n (%)           | n (%)   |
| I'm not sure                       | 25 (29)                    | 2 (4)   | 23 (27)                    | 2 (4)   | 23 (27)         | 2 (4)   | 22 (26)                    | 2 (4)   | 22 (26)            | 3 (5)   | 25 (30)                | 5 (9)   | 22 (26)         | 3 (5)   |
| Neither satisfied nor dissatisfied | 22 (26)                    | 4 (7)   | 22 (26)                    | 7 (13)  | 23 (27)         | 7 (12)  | 23 (27)                    | 4 (7)   | 23 (27)            | 4 (7)   | 26 (31)                | 7 (12)  | 23 (27)         | 6 (11)  |
| Slightly dissatisfied              |                            | 5 (9)   | 6 (7)                      | 4 (7)   | 2 (4)           | 4 (7)   |                            | 3 (5)   |                    | 1 (2)   |                        | 0       | 2 (2)           | 2 (4)   |
| Very dissatisfied                  |                            | 1 (2)   | 3 (4)                      | 1 (2)   | 1 (1)           | 2 (4)   |                            | 1 (2)   |                    | 0       |                        | 0       | 1 (1)           | 1 (2)   |
| Slightly satisfied                 | 17 (20)                    | 27 (47) | 12 (14)                    | 28 (50) | 15 (18)         | 23 (40) | 8 (10)                     | 20 (36) | 11 (13)            | 24 (42) | 6 (7)                  | 9 (16)  | 14 (17)         | 26 (46) |
| Very satisfied                     | 21 (25)                    | 18 (32) | 19 (22)                    | 14 (25) | 21 (25)         | 19 (33) | 31 (37)                    | 26 (46) | 28 (33)            | 25 (44) | 27 (32)                | 36 (63) | 22 (26)         | 19 (33) |

**Supplementary Table 13:** Satisfaction of farmers (n = 86) and animal health workers (n = 57) with the post-test laboratory service (clarity of results, advice for vet referral, prescription intervention).

| Rate                               | Clarity of Results |         | Advice for Vet Referral |         | Prescription Intervention |         |
|------------------------------------|--------------------|---------|-------------------------|---------|---------------------------|---------|
|                                    | Farmers            | AHW     | Farmers                 | AHW     | Farmers                   | AHW     |
|                                    | n (%)              | n (%)   | n (%)                   | n (%)   | n (%)                     | n (%)   |
| I'm not sure                       | 24 (28)            | 2 (4)   | 21 (25)                 | 4 (7)   | 23 (27)                   | 3 (5)   |
| Neither satisfied nor dissatisfied | 21 (25)            | 5 (9)   | 23 (27)                 | 5 (9)   | 24 (28)                   | 8 (14)  |
| Slightly dissatisfied              | 1 (1)              | 5 (9)   | 2 (2)                   | 4 (7)   | 1 (1)                     | 3 (5)   |
| Slightly satisfied                 | 11 (13)            | 22 (39) | 13 (15)                 | 17 (30) | 12 (14)                   | 21 (38) |
| Very dissatisfied                  | 1 (1)              | 2 (4)   | 1 (1)                   | 3 (5)   |                           | 2 (4)   |
| Very satisfied                     | 27 (32)            | 21 (37) | 25 (29)                 | 23 (41) | 25 (29)                   | 19 (34) |
